# Supplementary material for: Quest for extended coordination networks from highly connected azido-bridged clusters
Source: Royal Society of Chemistry journal article supplement (doi:10.1039/d2ce00854h), 2022-01-01
Supplement: d2ce00854h1.pdf [file d2ce00854h1.pdf]

## Supporting Information

### Quest for Extended Coordination Networks from High Connected Azido-Bridged Clusters

Shuai Li,<sup>a</sup> Song-De Han,<sup>b</sup> Jiong-Peng Zhao,<sup>\*,a</sup> Fu-Chen Liu<sup>a</sup>

Table S1. Selected bond lengths [°] and angles [Å] for **1** and **2**.

| <b>1</b>                                                                                                                                                                                                                                 |          |                           |          |
|------------------------------------------------------------------------------------------------------------------------------------------------------------------------------------------------------------------------------------------|----------|---------------------------|----------|
| Co1—O3 <sup>i</sup>                                                                                                                                                                                                                      | 2.070(5) | Co1—N1                    | 2.164(5) |
| Co1—O1                                                                                                                                                                                                                                   | 2.077(5) | Co1—N1 <sup>iii</sup>     | 2.185(5) |
| Co1—O2 <sup>ii</sup>                                                                                                                                                                                                                     | 2.126(4) | Co1—N1 <sup>iv</sup>      | 2.193(6) |
| Co1—N1—Co1 <sup>vi</sup>                                                                                                                                                                                                                 | 141.7(3) | Co1—N1—Co1 <sup>ii</sup>  | 91.7(2)  |
| Co1 <sup>vi</sup> —N1—Co1 <sup>ii</sup>                                                                                                                                                                                                  | 91.1(2)  |                           |          |
| <sup>i</sup> $-y+1/3, x-y-1/3, z-1/3$ ; <sup>ii</sup> $y+1/3, -x+y+2/3, -z+2/3$ ; <sup>iii</sup> $-y+1, x-y, z$ ; <sup>iv</sup> $x-y+1/3, x-1/3, -z+2/3$ ;<br><sup>v</sup> $-x+y+2/3, -x+1/3, z+1/3$ ; <sup>vi</sup> $-x+y+1, -x+1, z$ . |          |                           |          |
| <b>2</b>                                                                                                                                                                                                                                 |          |                           |          |
| Co1—O2 <sup>i</sup>                                                                                                                                                                                                                      | 2.064(6) | Co1—O3 <sup>ii</sup>      | 2.097(6) |
| Co1—O1                                                                                                                                                                                                                                   | 2.078(6) | Co1—N4 <sup>iii</sup>     | 2.100(7) |
| Co1—N4                                                                                                                                                                                                                                   | 2.080(7) | Co1—N1                    | 2.422(6) |
| Co1—N4—Co1 <sup>i</sup>                                                                                                                                                                                                                  | 100.8(3) | Co1—N1—Co1 <sup>iii</sup> | 83.4(2)  |
| Co1 <sup>i</sup> —N1—Co1 <sup>iii</sup>                                                                                                                                                                                                  | 140.2(7) |                           |          |
| <sup>i</sup> $y, -x+1/2, z$ ; <sup>ii</sup> $-y, x-1/2, -z+2$ ; <sup>iii</sup> $-y+1/2, x, z$ ; <sup>iv</sup> $y+1/2, -x, -z+2$ .                                                                                                        |          |                           |          |

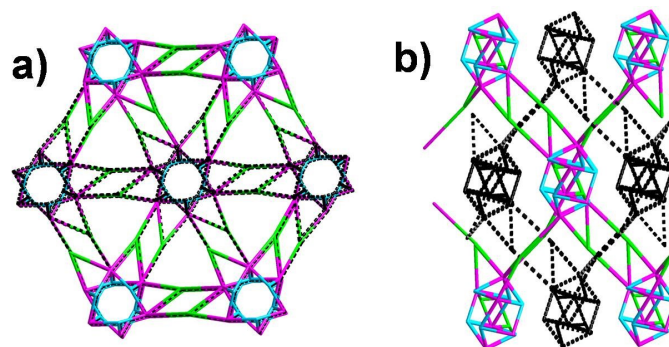

**Fig. S1** a) Front view of the (3,6)-connected 3-nodal topological net of **1**. b) Side view of 3D network of **1**.

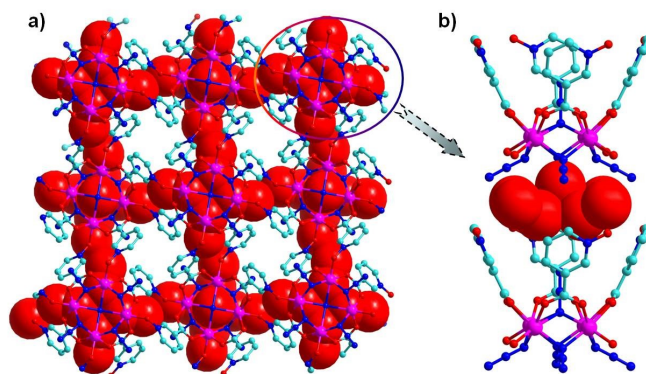

**Fig. S2** a) The two-dimensional layers of **2** containing protonated water aggregate. b) The protonated water clusters  $H^+(H_2O)_5$  are stabilized in two goblets of **2**.

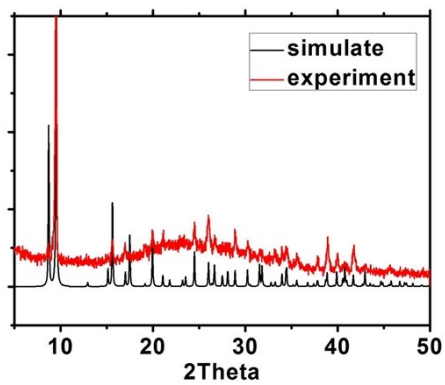

a)

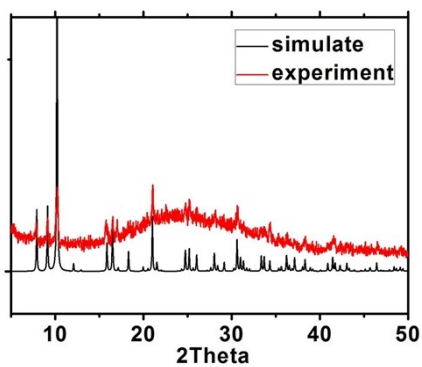

b)

**Fig. S3** The XRPD diagrams for complexes: a) for **1**, b) for **2**.

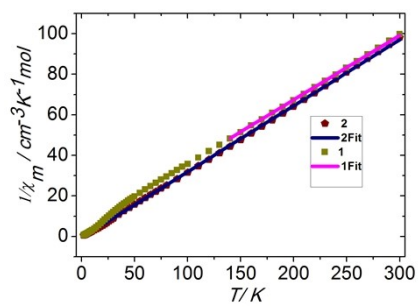

**Fig. S4** Curie plots of **1** and **2** and the best-fit of the data through Curie–Weiss law.

Table S2. The Co-N-Co angle and magnetic coupling in some EO bridged cobalt complexes.

| <i>Co-N-Co angle (°)</i> | <i>Bridges</i>                                 | <i>Magnetic coupling</i>      | <i>Ref</i> |
|--------------------------|------------------------------------------------|-------------------------------|------------|
| 93.60 and 93.68          | Double EO azide and <i>syn,syn</i> carboxylate | F J = 10.7 cm <sup>-1</sup>   | 1          |
| 97.2 and 97.6            | Double EO azide and <i>syn,syn</i> carboxylate | F J = 13.9 cm <sup>-1</sup>   | 2          |
| 94.74 and 96.83          | Double EO azide and <i>syn,syn</i> carboxylate | F J = 13.2 cm <sup>-1</sup>   | 3          |
| 95.85 and 95.85          | Double EO azide and <i>syn,syn</i> carboxylate | F J = 8.1 cm <sup>-1</sup>    | 3          |
| 94.54 and 94.76          | Double EO azide and <i>syn,syn</i> carboxylate | F J = 13.8 cm <sup>-1</sup>   | 3          |
| 95.47 and 97.4           | Double EO azide and <i>syn,syn</i> carboxylate | F J = 10.6 cm <sup>-1</sup>   | 4          |
| 94.73 and 96.24          | Double EO azide and <i>syn,syn</i> carboxylate | F J = 8.1 cm <sup>-1</sup>    | 5          |
| 95.49 and 94.99          | Double EO azide and <i>syn,syn</i> carboxylate | F                             | 6          |
| 96.29 and 92.23          | Double EO azide and <i>syn,syn</i> carboxylate | F                             | 7          |
| 92.79 and 93.38          | Double EO azide and <i>syn,syn</i> carboxylate | F J = 13.96 cm <sup>-1</sup>  | 8          |
| 91.62 and 91.67          | Double EO azide and <i>syn,syn</i> carboxylate | F                             | 9          |
| 129                      | EO azide, <i>syn,syn</i> carboxylate and O     | F                             | 10         |
| 120.74                   | Double <i>syn,syn</i> carboxylate and EO azide | F                             | 11         |
| 114.51                   | Double <i>syn,syn</i> carboxylate and EO azide | F                             | 12         |
| 122                      | Double <i>syn,syn</i> carboxylate and EO azide | F J = 54.1 cm <sup>-1</sup>   | 13         |
| 115.12                   | Double <i>syn,syn</i> carboxylate and EO azide | F J = 10.3 cm <sup>-1</sup>   | 14         |
| 116.14                   | Double <i>syn,syn</i> carboxylate and EO azide | F J = 66.8 cm <sup>-1</sup>   | 15         |
| 124.37                   | <i>syn,syn</i> carboxylate and EO azide        | F                             | 16         |
| 128                      | <i>syn,syn</i> carboxylate and EO azide        | F                             | 17         |
| 117.3                    | <i>syn,syn</i> carboxylate and EO azide        | F                             | 18         |
| 120.09                   | EO azide                                       | AF J = -2.98 cm <sup>-1</sup> | 18         |
| 112.3                    | EO azide                                       | F                             | 19         |
| 128.04                   | <i>syn,syn</i> carboxylate and EO azide        | F                             | 20         |
| 123.88                   | <i>syn,syn</i> carboxylate and EO azide        | F J = 7.86 cm <sup>-1</sup>   | 21         |
| 122.10                   | <i>syn,syn</i> carboxylate and EO azide        | F J = 2.06 cm <sup>-1</sup>   | 21         |
| 112.93                   | <i>syn,syn</i> carboxylate and EO azide        | F                             | 22         |
| 127.42                   | <i>syn,syn</i> carboxylate and EO azide        | F J = 31.0 cm <sup>-1</sup>   | 23         |

1. Y. Ma, J. Y. Zhang, A. L. Cheng, Q. Sun, E. Q. Gao and C. M. Liu, *Inorg. Chem.*, 2009, **48**, 6142-6151.
2. T. Liu, Y. Zhang, Z. Wang and S. Gao, *Inorg. Chem.*, 2006, **45**, 2782-2784.
3. Q. X. Jia, H. Tian, J. Y. Zhang and E. Q. Gao, *Chem. -Eur. J.*, 2011, **17**, 1040-1051.
4. Y. Q. Wang, X. M. Zhang, X. B. Li, B. W. Wang and E. Q. Gao, *Inorg. Chem.*, 2011, **50**, 6314-6322.
5. F. Liu, P. Li, W. Gao, X.-M. Zhang and J.-P. Liu, *Inorg. Chim. Acta.*, 2016, **451**, 116-122.
6. J.-J. Liu, S.-B. Xia, X. Shen, D. Liu and F.-X. Cheng, *J. Solid state Chem.*, 2019, **275**, 88-94.
7. F. C. Liu, M. Xue, H. C. Wang and J. Ou-Yang, *Eur. J. Inorg. Chem.*, 2010, **2010**, 4444-4449.
8. Y.-Q. Wen, Y. Ma, Y.-Q. Wang, X.-M. Zhang and E.-Q. Gao, *Inorg. Chem. Commun.*, 2012, **20**, 46-49.
9. L. Lisnard, P. Mialane, A. Dolbecq, J. Marrot, J. M. Clemente-Juan, E. Coronado, B. Keita, P. de Oliveira, L. Nadjo and F. Secheresse, *Chem. -Eur. J.*, 2007, **13**, 3525-3536.
10. L. Lisnard, P. Mialane, A. Dolbecq, J. Marrot, J. M. Clemente-Juan, E. Coronado, B. Keita, P. de

- Oliveira, L. Nadjo and F. Secheresse, *Chem.-Eur. J.*, 2007, **13**, 3525-3536.
11. Y. Q. Wang, A. L. Cheng, P. P. Liu and E. Q. Gao, *Chem. Commun.*, 2013, **49**, 6995-6997.
  12. Y.-Q. Wang, Q.-H. Tan, X.-Y. Guo, H.-T. Liu, Z.-L. Liu and E.-Q. Gao, *RSC Adv.*, 2016, **6**, 72326-72332.
  13. X. M. Zhang, Y. Q. Wang, K. Wang, E. Q. Gao and C. M. Liu, *Chem. Commun.*, 2011, **47**, 1815-1817.
  14. Y. Ma, X. B. Li, X. C. Yi, Q. X. Jia, E. Q. Gao and C. M. Liu, *Inorg. Chem.*, 2010, **49**, 8092-8098.
  15. Y. Q. Wang, W. W. Sun, Z. D. Wang, Q. X. Jia, E. Q. Gao and Y. Song, *Chem. Commun.*, 2011, **47**, 6386-6388.
  16. C. J. Milios, A. Prescimone, J. Sanchez-Benitez, S. Parsons and E. K. Brechin, *Inorg. Chem.*, 2006, **45**, 7053-7055.
  17. Q. Yang, J. P. Zhao, W. C. Song and X. H. Bu, *Dalton Trans.*, 2012, **41**, 6272-6276.
  18. M. G. Sommer, R. Marx, D. Schweinfurth, Y. Rechkemmer, P. Neugebauer, M. van der Meer, S. Hohloch, S. Demeshko, F. Meyer, J. van Slageren and B. Sarkar, *Inorg. Chem.*, 2017, **56**, 402-413.
  19. B.-W. Hu, J.-P. Zhao, Q. Yang, X.-F. Zhang, M. Evangelisti, E. C. Sañudo and X.-H. Bu, *Dalton Trans.*, 2010, **39**, 11210-11217.
  20. S. Hamedani, H. Aghaie, *Chinese. J. Struc.Chem.*, 2015, **34**, 1307-1316.
  21. Z. He, Z.-M. Wang, S. Gao, and Ch.-H. Yan, *Inorg. Chem.*, 2006, **45**, 6694-6705.
  22. Q. Yang, X.-F. Zhang, J.-P. Zhao, B.-W. Hu and X.-H. Bu, *Crystal. Growth Des.*, 2011, **11**, 2839-2845.
  23. X. M. Zhang, K. Wang, Y. Q. Wang and E. Q. Gao, *Dalton Trans.*, 2011, **40**, 12742-12749.
